# Supplementary material for: Intermittent Energy Restriction for Adolescents With Obesity: The Fast Track to Health Randomized Clinical Trial
Source: PubMed Central journal article supplement (PMC11348084; doi:10.1001/jamapediatrics.2024.2869), 2024-08-26
Supplement: jamapediatr-e242869-s003.pdf [file jamapediatr-e242869-s003.pdf]

## Data Sharing Statement

Lister. Intermittent Energy Restriction for Adolescents With Obesity. *JAMA Pediatr*. Published August 26, 2024. doi:10.1001/jamapediatrics.2024.2869

### Data

**Data available:** No

### Additional Information

**Explanation for why data not available:** Data may be shared subject to further ethics approval.
